# Supplementary material for: A prospective analysis of mucosal microbiome-metabonome interactions in colorectal cancer using a combined MAS 1HNMR and metataxonomic strategy
Source: Sci Rep. 2017 Aug 21;7:8979. doi: 10.1038/s41598-017-08150-3 (PMC5566496; doi:10.1038/s41598-017-08150-3)
Supplement: Supplementary file 1 — Supplementary Information [file 41598_2017_8150_MOESM1_ESM.pdf]

## **Supplementary data**

A prospective analysis of mucosal microbiome-metabonome interactions in colorectal cancer using a combined MAS 1HNMR and metataxonomic strategy.

James Kinross<sup>1</sup>, Reza Mirnezami<sup>1</sup>, James Alexander<sup>1</sup>, Richard Brown<sup>5</sup>, Alasdair Scott<sup>1</sup>, Dieter Galea<sup>2</sup>, Kirill Veselkov<sup>2</sup>, Rob Goldin<sup>3</sup>, Ara Darzi<sup>1</sup>, Jeremy Nicholson,<sup>2</sup> Julian R. Marchesi<sup>\*4, 5</sup>.

1. Biosurgery and Surgical Technology, Department of Surgery and Cancer, Imperial College London, UK.

2. Computational and Systems Medicine, Faculty of Medicine, Department of Surgery and Cancer, Imperial College London, UK.

3. Centre for Pathology, Faculty of Medicine, Imperial College London, UK.

4. Division of Digestive Diseases, Faculty of Medicine, Department of Surgery and Cancer, Imperial College London, UK

5. School of Biosciences, Cardiff University, Cardiff, UK

|                     | Cluster 1 | Cluster 2 | Cluster 3 | Significance (p=) |
|---------------------|-----------|-----------|-----------|-------------------|
| Location            |           |           |           | 0.842             |
| 10cm                | 10        | 5         | 3         |                   |
| 5cm                 | 10        | 5         | 3         |                   |
| Tumour center       | 13        | 3         | 2         |                   |
| N stage             |           |           |           | 0.097             |
| 0                   | 24        | 6         | 3         |                   |
| 1                   | 7         | 3         | 2         |                   |
| 2                   | 2         | 4         | 3         |                   |
| T stage             |           |           |           | 0.04*             |
| 0                   | 6         | 3         | 0         |                   |
| 1                   | 3         | 0         | 0         |                   |
| 2                   | 0         | 3         | 0         |                   |
| 3                   | 12        | 3         | 0         |                   |
| 4                   | 12        | 4         | 8         |                   |
| Histo subtype       |           |           |           | 0.05*             |
| Adeno               | 12        | 10        | 8         |                   |
| Mucinous            | 12        | 3         | 0         |                   |
| Dysplasia           | 9         | 0         | 0         |                   |
| Differentiation     |           |           |           | 0.011*            |
| None                | 3         | 0         | 0         |                   |
| Moderate            | 17        | 13        | 3         |                   |
| Poor                | 13        | 0         | 5         |                   |
| LVI                 |           |           |           | 0.072             |
| None                | 19        | 9         | 8         |                   |
| Present             | 14        | 4         | 0         |                   |
| Perineural invasion |           |           |           |                   |
| None                | 30        | 13        | 8         | 0.364             |
| Present             | 3         | 0         | 0         |                   |
| KRAS                |           |           |           |                   |
| Wild type           | 29        | 11        | 8         | 0.529             |
| Mutation            | 4         | 2         | 0         |                   |
| EMVI                |           |           |           |                   |
| None                | 24        | 9         | 6         | 0.982             |
| Present             | 9         | 4         | 2         |                   |

Table 1. Oncological features of three mucosal 'enterotypes'. T stage, histological subtype and tumour differentiation were statistically significant for differentiating between classes. Cluster 1 and 2 contained patients with dysplastic lesions and earlier cancers, and class 2 only contained moderately differentiated tumours. The third cluster of 8 patients was only made up T4 adenocarcinomas, with poor tumour differentiation and a trend towards nodal metastases. LVI = Lymphovascular invasion. EMVI = Extramural vascular invasion.

|                     | Clustered | Not Clustered | Significance (p=) |
|---------------------|-----------|---------------|-------------------|
| Location            |           |               | 1.00              |
| 10cm                | 6         | 12            |                   |
| 5cm                 | 6         | 12            |                   |
| Tumour center       | 6         | 12            |                   |
| N stage             |           |               | 0.017*            |
| 0                   | 15        | 18            |                   |
| 1                   | 0         | 12            |                   |
| 2                   | 3         | 6             |                   |
| T stage             |           |               | 0.073             |
| 0                   | 3         | 6             |                   |
| 1                   | 0         | 3             |                   |
| 2                   | 3         | 0             |                   |
| 3                   | 6         | 9             |                   |
| 4                   | 6         | 18            |                   |
| Histo subtype       |           |               | 0.054             |
| Adeno               | 9         | 21            |                   |
| Mucinous            | 3         | 12            |                   |
| Dysplasia           | 6         | 3             |                   |
| Differentiation     |           |               | 0.038*            |
| None                | 3         | 0             |                   |
| Moderate            | 6         | 24            |                   |
| Poor                | 9         | 12            |                   |
| LVI                 |           |               | 0.066             |
| None                | 15        | 21            |                   |
| Present             | 3         | 15            |                   |
| Perineural invasion |           |               | 0.208             |
| None                | 18        | 33            |                   |
| Present             | 0         | 3             |                   |
| KRAS                |           |               | 0.358             |
| Wild type           | 15        | 33            |                   |
| Mutation            | 3         | 3             |                   |
| EMVI                |           |               | 0.197             |
| None                | 15        | 24            |                   |
| Present             | 3         | 12            |                   |

Table 2: Oncological prognostic features of patients whose on and off tumour samples clustered together. Nodal involvement and tumour differentiation were statistically significant descriptors of differences between the two cohorts, with non-significant trends noted for T stage, histological subtype and LVI.

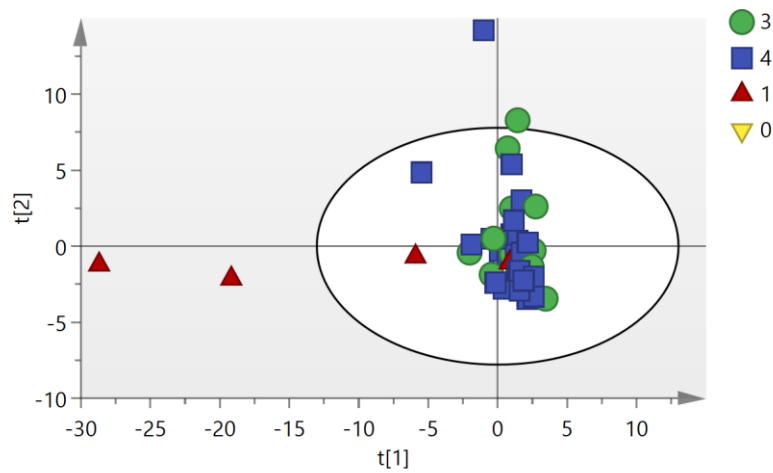

Figure 1. PCA plot of all samples according to tumour stage ( $R^2X = 0.278$ ,  $Q^2X = 0.07$ ). The three outliers were removed from the remaining analysis, leaving 51 samples in total.

|                     | Samples | PCs | $R^2Y$ | $Q^2Y$ | Diagnostic accuracy % |
|---------------------|---------|-----|--------|--------|-----------------------|
| T stage             | 51      | 2   | 0.46   | 0.18   | 84.3                  |
| N stage             | 51      | 2   | 0.58   | 0.339  | 88.2                  |
| Histo subtype       | 51      | 2   | 0.46   | 0.274  | 90.3                  |
| Differentiation     | 51      | 2   | 0.65   | 0.273  | 90.25                 |
| LVI                 | 51      | 2   | 0.79   | 0.429  | 98.04                 |
| Perineural invasion | 51      | 2   | 0.89   | 0.659  | 100                   |
| EMVI                | 51      | 2   | 0.802  | 0.293  | 94.12                 |
| KRAS                | 51      | 2   | 0.893  | 0.511  | 100                   |

Table 3. Summary data for the Partial Least Squares Discriminant multivariate models. PC= Principle component. Overall diagnostic accuracy of the model is demonstrated based on the creation of a confusion matrix. LVI = Lymphovascular invasion. EMVI = Extramural vascular invasion.

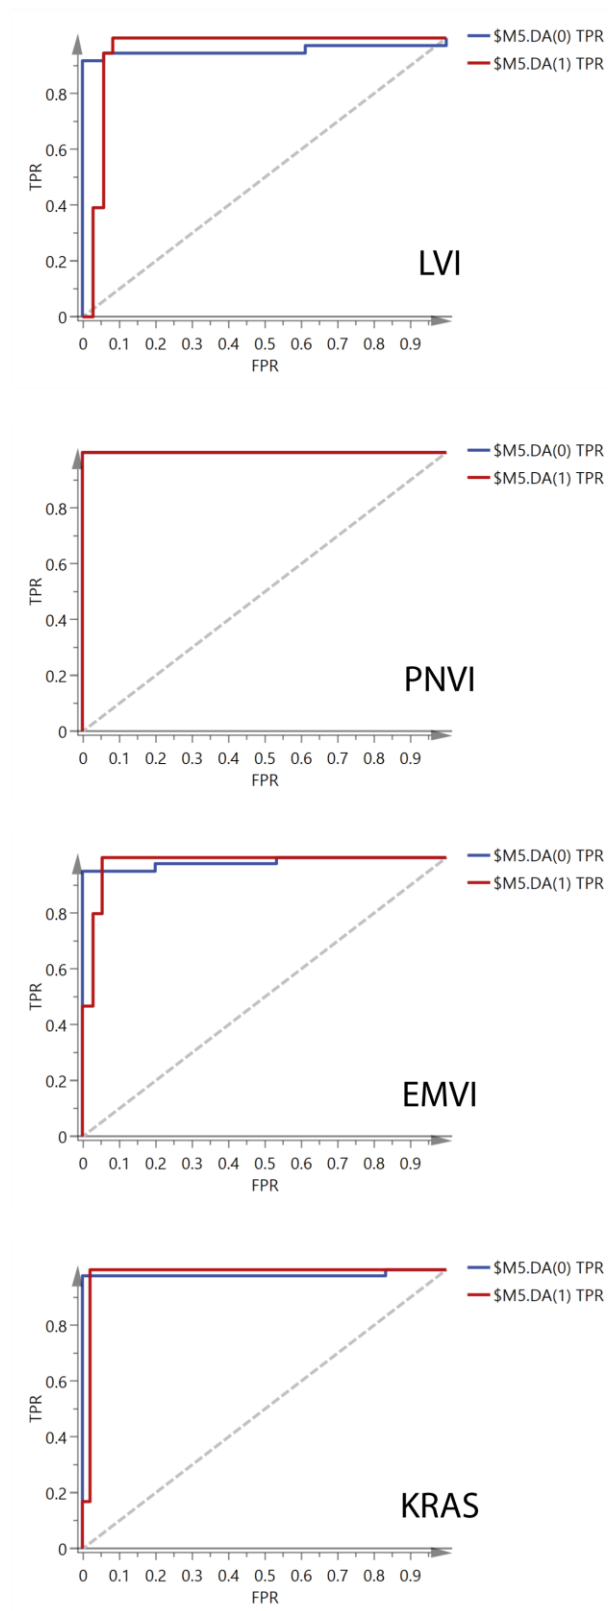

Figure 2: Summary receiver operating curves (ROC) curves built for each prognostic model with two diagnostic variables. LVI = Lymphovascular invasion. EMVI = Extramural vascular invasion. PNVI = Perineural vascular invasion.

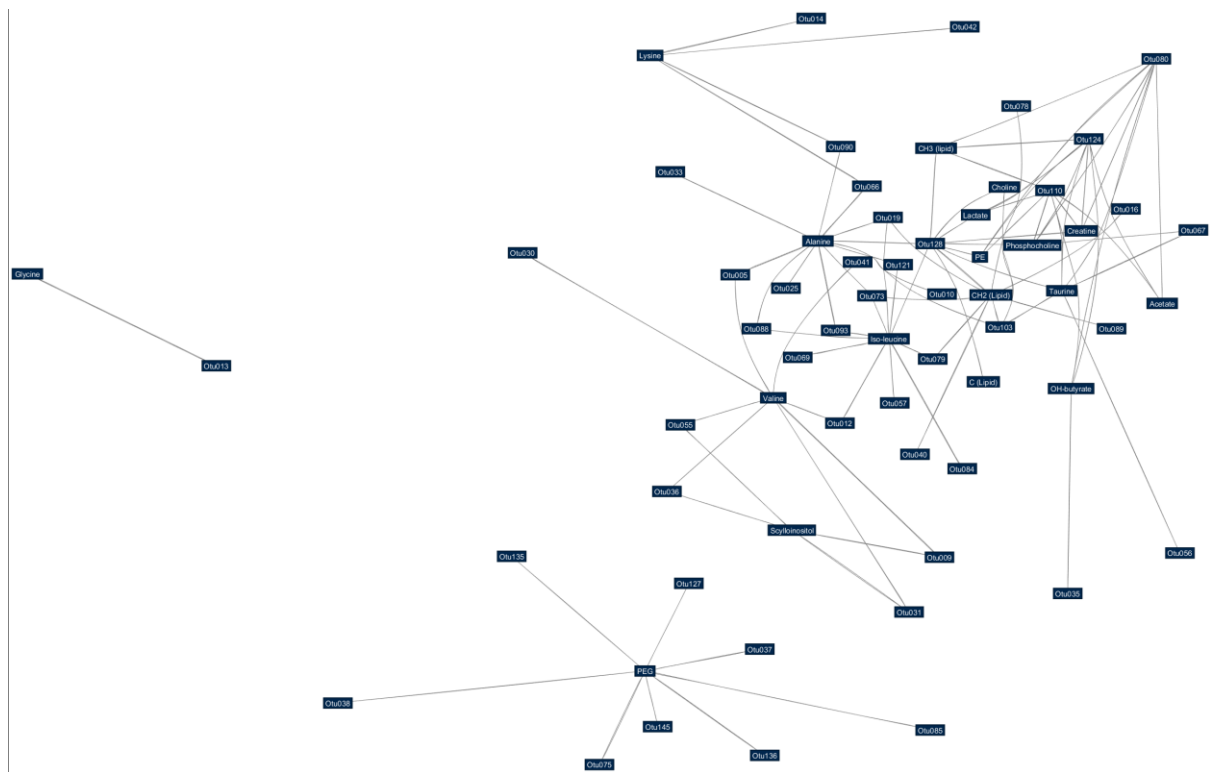

a)

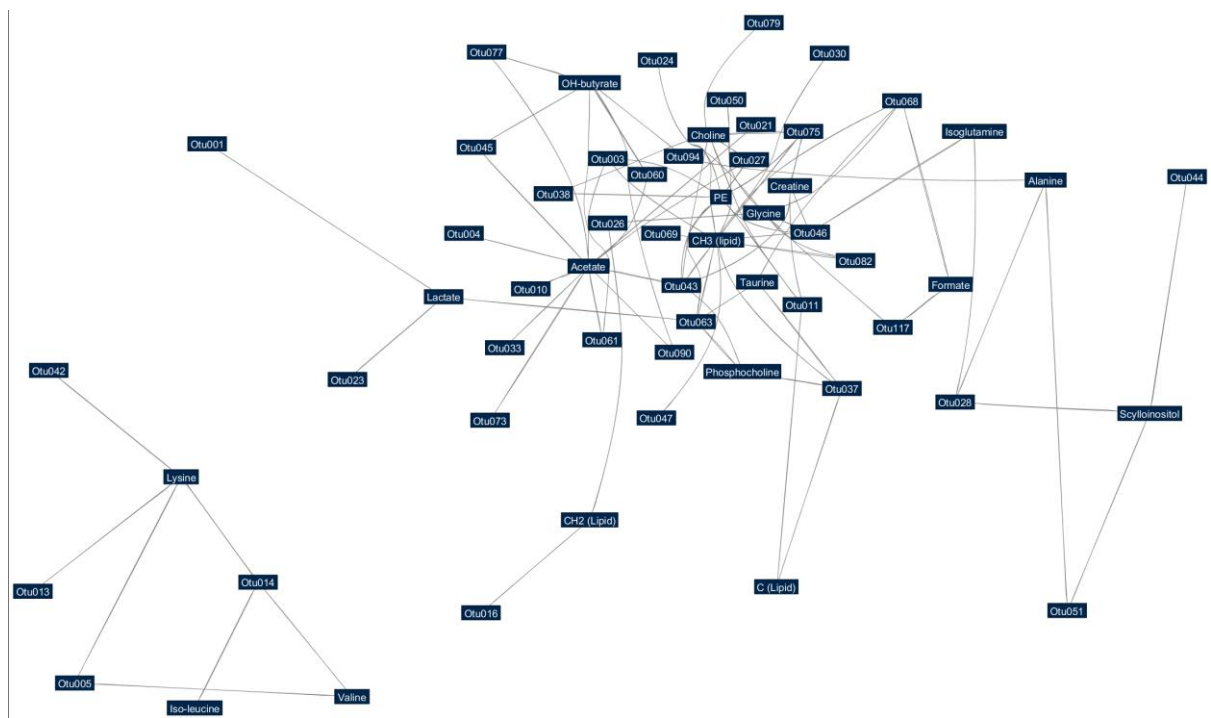

b)

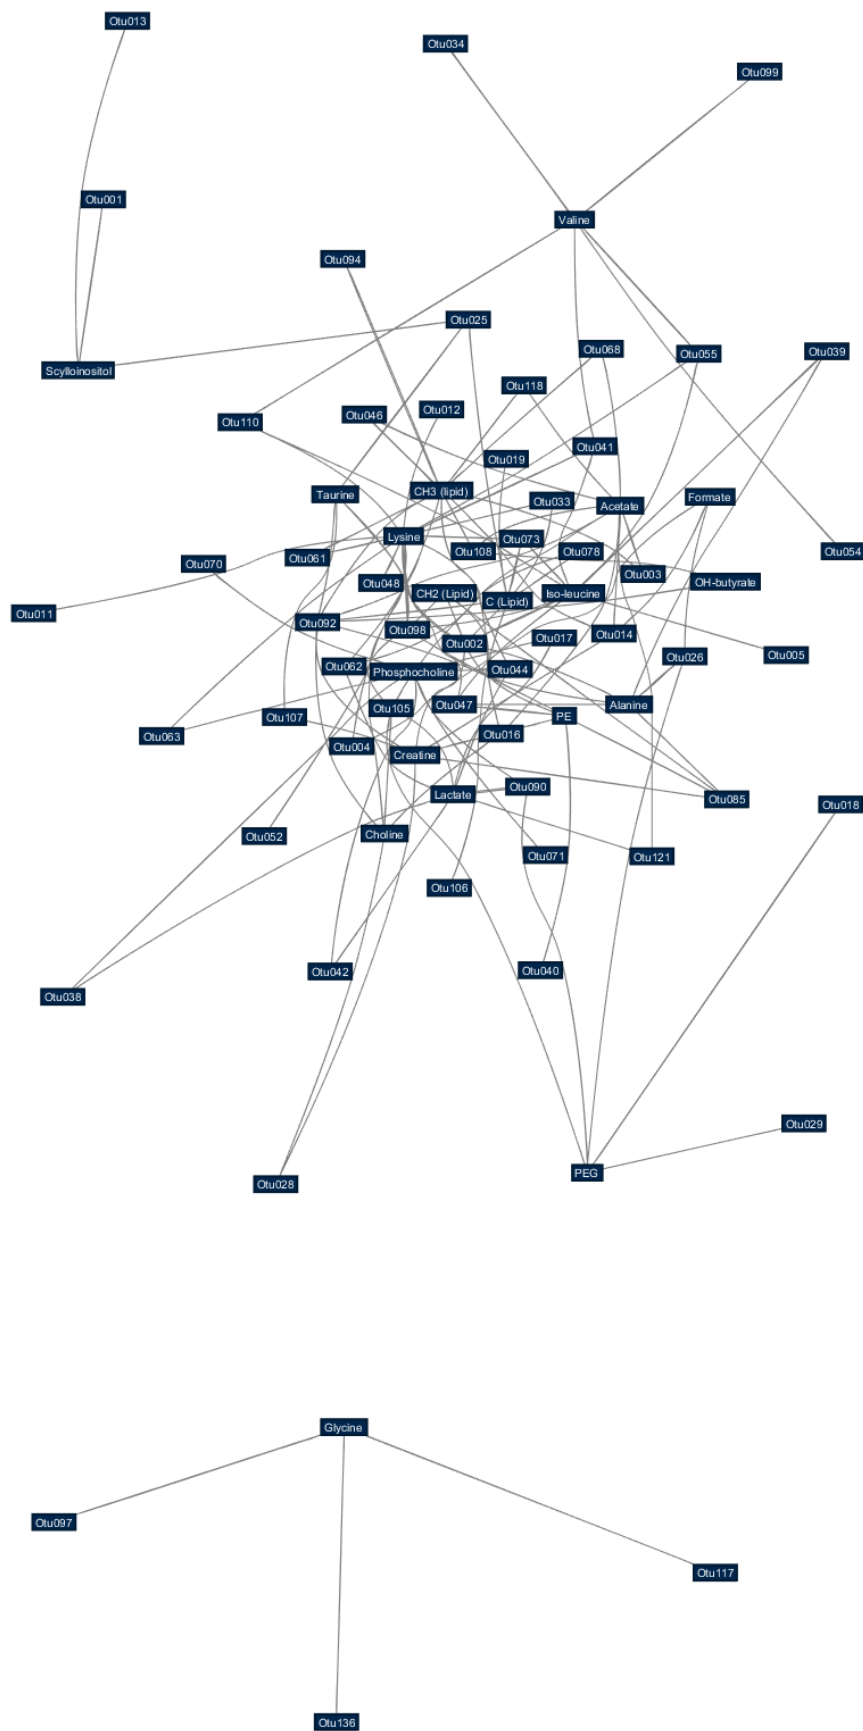

c)

Figure 3.  $^1\text{H}$  MAS-NMR / OTU Correlation networks for a) Stage 0/1 b) stage 3 and c) stage 4 cancers, visualized separately according to a p-value threshold of 0.05.
